# Supplementary material for: Alpinia officinarum Rhizome ameliorates the UVB induced photoaging through attenuating the phosphorylation of AKT and ERK
Source: PubMed Central journal article supplement (PMC9487146; doi:10.1186/s12906-022-03707-w), 2022-09-02

Figure 6A.

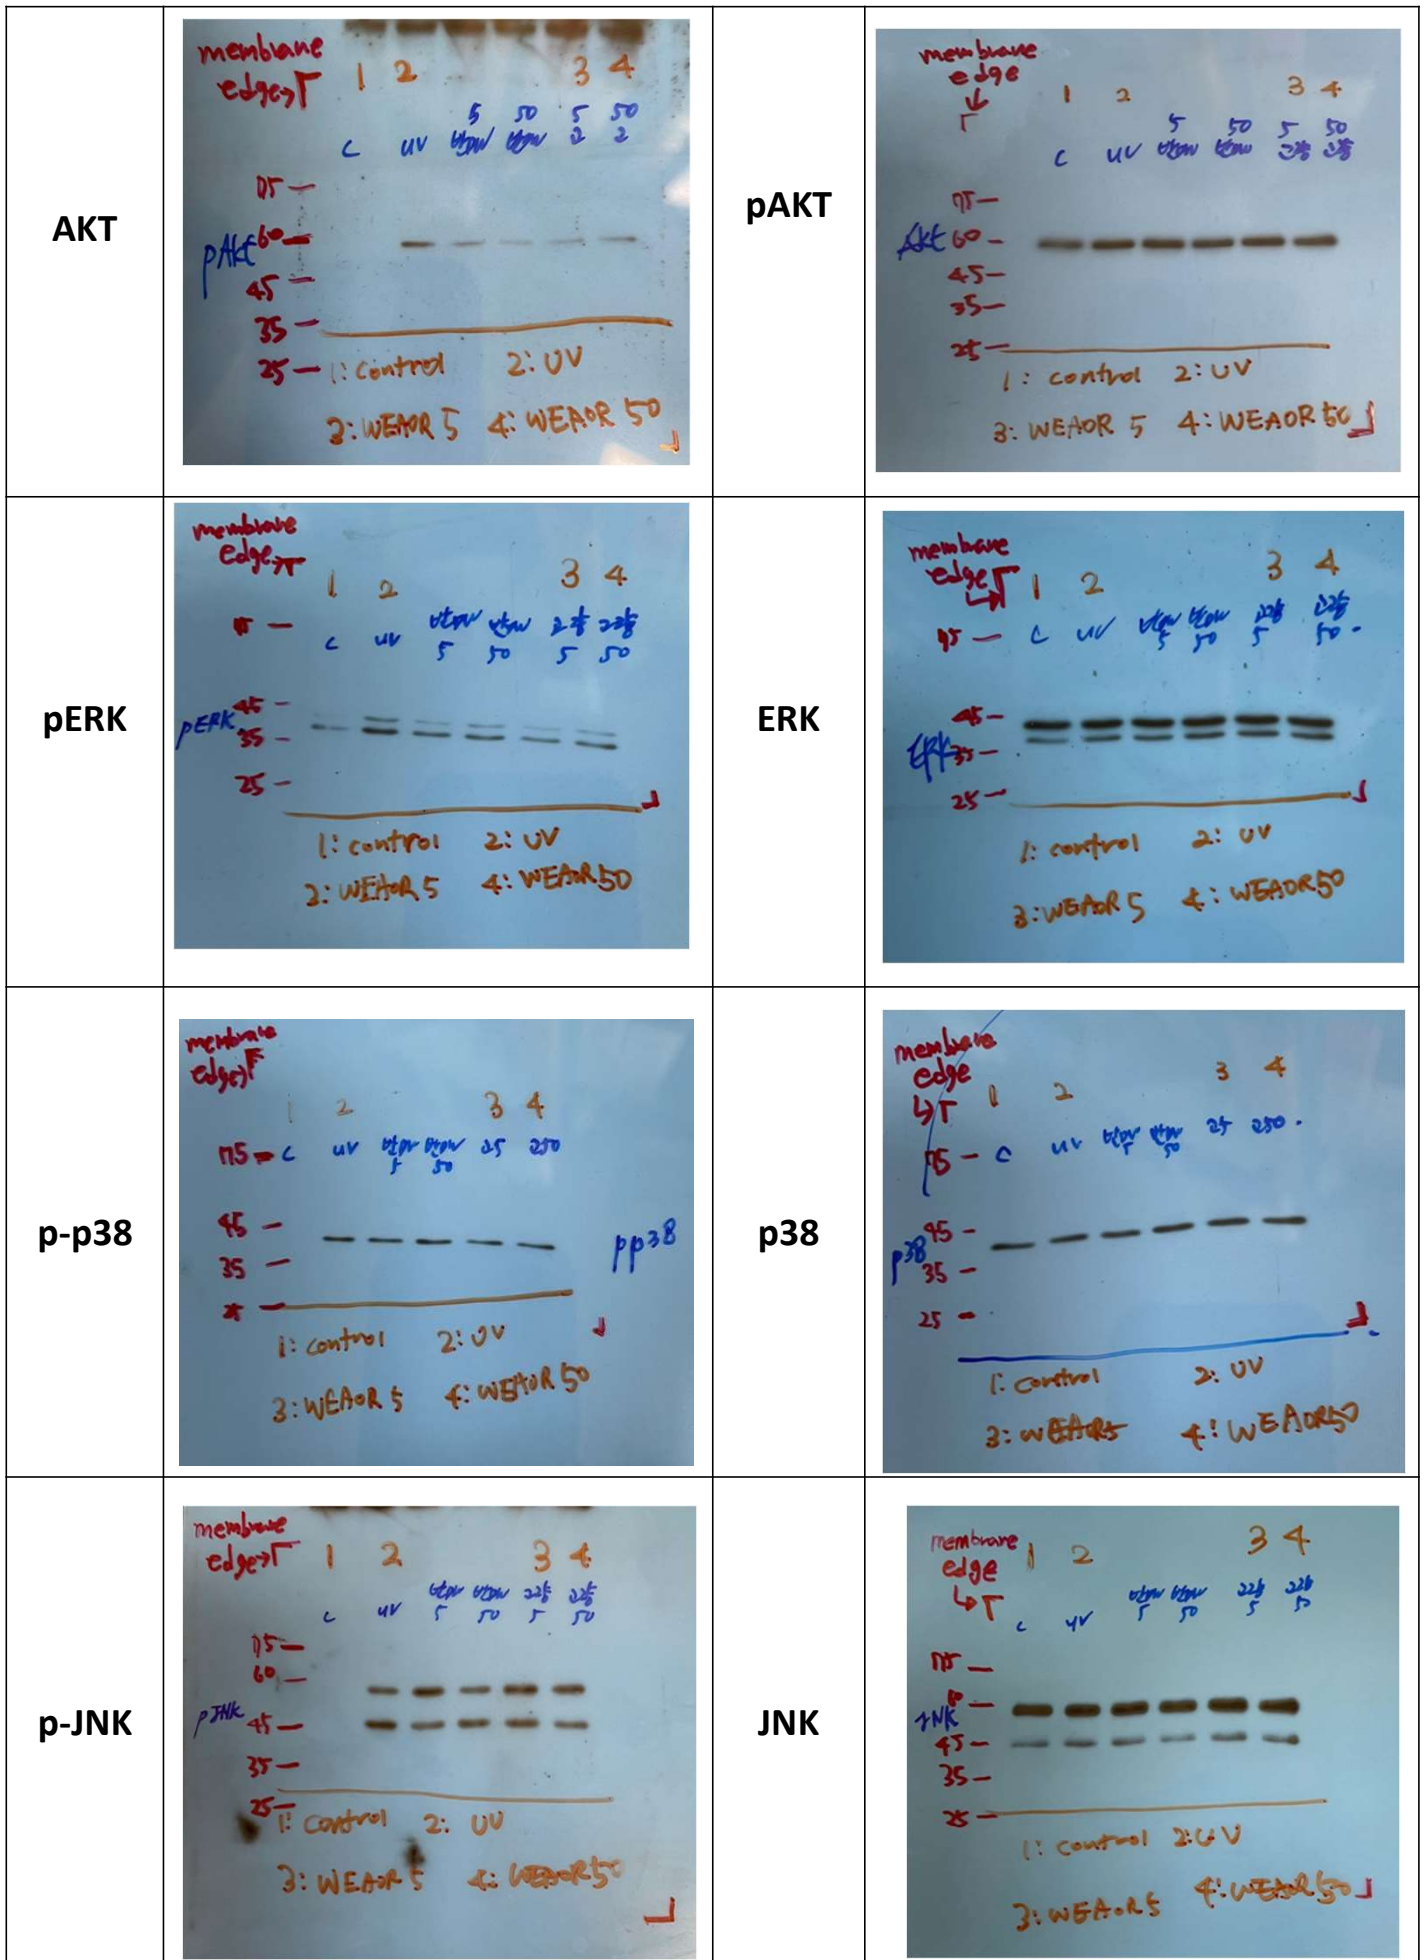

Figure 6A.

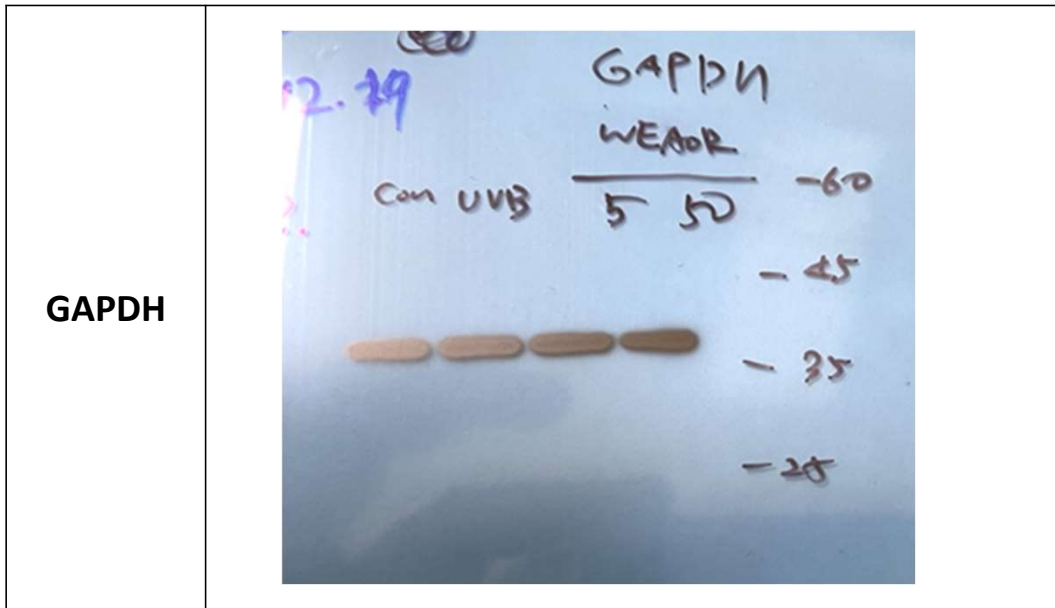

Figure 7A, B

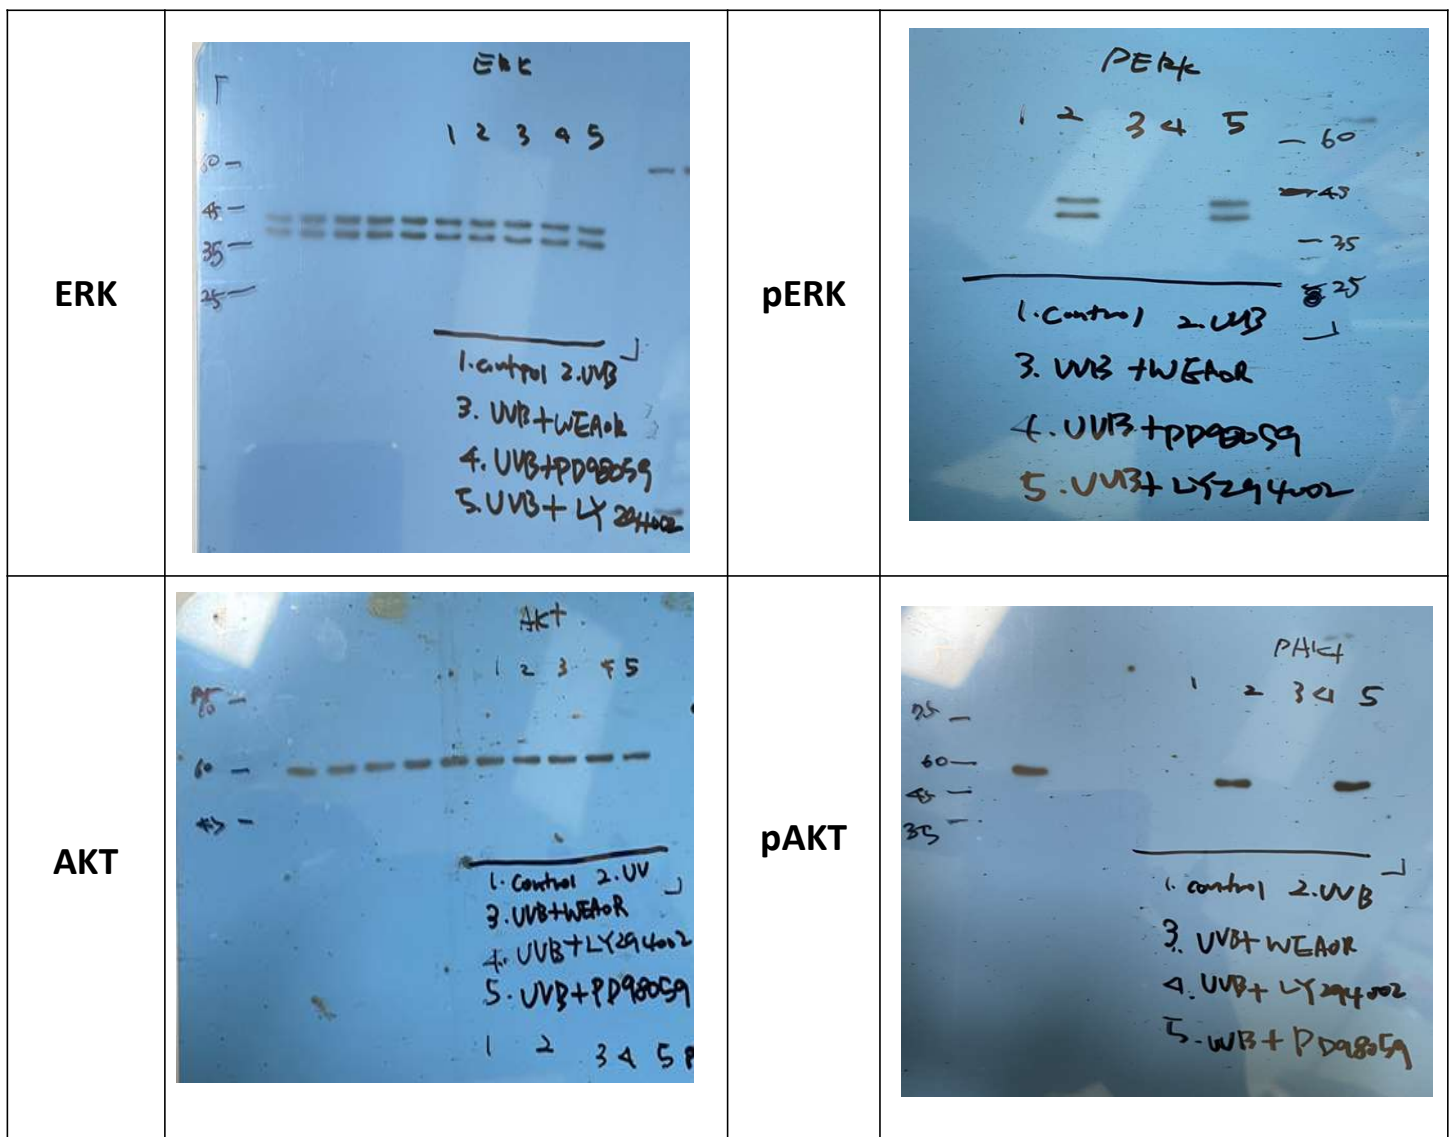

Supplement: 12906_2022_3707_MOESM1_ESM.pdf [file 12906_2022_3707_MOESM1_ESM.pdf]
